# Supplementary material for: Evaluation of Patient-Facing Mobile Apps to Support Physiotherapy Care: Systematic Review
Source: PubMed Central journal article supplement (PMC10949126; doi:10.2196/55003), 2024-03-04
Supplement: mhealth_v12i1e55003_app2.pdf [file mhealth_v12i1e55003_app2.pdf]

| App name                 | Data privacy transparency | Companion app | Platform | App focus       | Physio specialty | Targeted behaviors if evident:                                                                                           | Simplified target behaviors                                                                                                                                           | Country (origin) | Developer qualifications | Google Play (app version) | Google Play Payment Method        | Google Play cost (AUD\$) | Apple app version) | Apple Payment method                       | Apple cost (AUD\$) |
|--------------------------|---------------------------|---------------|----------|-----------------|------------------|--------------------------------------------------------------------------------------------------------------------------|-----------------------------------------------------------------------------------------------------------------------------------------------------------------------|------------------|--------------------------|---------------------------|-----------------------------------|--------------------------|--------------------|--------------------------------------------|--------------------|
| A Rehab Diary            | Y                         | -             | Both     | General         | -                | Perform training/rehabilitation exercise program, track movement, set goals, compliance, RPE and pain throughout program | Performing therapeutic exercise (general); Recording information about exercise; Communication with health professional                                               | Australia        | HCP                      | 1.1                       | Free                              | Free                     | -                  | Free                                       | Free               |
| AllyCare                 | Y                         | Y             | Both     | General         | MSK              | Perform rehabilitation exercises; communicate with health professional; track progress; set goals                        | Performing therapeutic exercise (general); Recording information about exercise; Communication with health professional; setting goals                                | Singapore        | Not clear                | 1.4.11                    | Free (in app purchases available) | Free                     | 1.4.11             | Free (subscription version also available) | Free               |
| Back Pain Diary          | Y                         | -             | Both     | Back pain       | MSK              |                                                                                                                          | Recording information about exercise                                                                                                                                  | Netherlands      | Not clear                | 1.0.3                     | In-app purchases                  | \$4.89 - \$32.99 / item  | 1.1                | Free (subscription version also available) | Free               |
| BlueJay Engage - Patient | Y                         | Y             | Both     | General         | -                | Perform home exercise program; communicate with your therapist; log pain and movement progress                           | Performing therapeutic exercise (general); Recording information about exercise; Recording information about health condition; Communication with health professional | United States    | Not clear                | 8.1.7                     | Free                              | Free                     | 8.1.7              | Free                                       | Free               |
| Complex Core             | Y                         | Y             | Both     | Core, arm, legs | MSK              | Perform flexibility and strength training, and coordination                                                              | Performing therapeutic exercise (general)                                                                                                                             | Austria          | Not clear                | 1.2.0                     | One off payment                   | \$8.99                   | 2.0.0              | One off payment                            | \$9.99             |

|                             |   |   |       |                |       |                                                                                                                                              |                                                                                                                         |               |           |       |      |      |       |                                            |      |
|-----------------------------|---|---|-------|----------------|-------|----------------------------------------------------------------------------------------------------------------------------------------------|-------------------------------------------------------------------------------------------------------------------------|---------------|-----------|-------|------|------|-------|--------------------------------------------|------|
|                             |   |   |       |                |       | and endurance training                                                                                                                       |                                                                                                                         |               |           |       |      |      |       |                                            |      |
| CP-Fit                      | Y | - | Apple | Cerebral palsy | Paeds | Perform exercises                                                                                                                            | Performing therapeutic exercise (paediatrics-cerebral palsy); Recording information about exercise                      | United States | Not clear | -     | -    | -    | -     | Free                                       | Free |
| Embodia                     | Y | Y | Both  | General        | -     | Access and perform your personalised home exercise program; track your adherence and progress; securely communication with your practitioner | Performing therapeutic exercise (general); Recording information about exercise; Communication with health professional | Not clear     | Not clear | 3.3.0 | Free | Free | 4.3.0 | Free                                       | Free |
| ExorLive Go                 | Y | Y | Both  | General        | MSK   | Perform training/rehabilitation exercise program; track movement, set goals, compliance, progress                                            | Performing therapeutic exercise (general); Recording information about exercise; Communication with health professional | Norway        | HCP       | 4.0.3 | Free | Free | 4.0.3 | Free (in app purchases available)          | Free |
| Extensor -- Physio Patients | Y | Y | Both  | General        | -     | shows you how to perform your exercises; remember how to do your exercises within app reminders                                              | Performing therapeutic exercise (general); Recording information about exercise; Communication with health professional | Austria       | Not clear | 1.2.1 | Free | Free | 1.2.5 | Free (subscription version also available) | Free |

|                      |   |   |      |                             |     |                                                                                                                                                                                  |                                                                                     |           |           |        |                 |        |        |                 |        |
|----------------------|---|---|------|-----------------------------|-----|----------------------------------------------------------------------------------------------------------------------------------------------------------------------------------|-------------------------------------------------------------------------------------|-----------|-----------|--------|-----------------|--------|--------|-----------------|--------|
| Guided Physio        | Y | - | Both | General                     | MSK | Patients better managing their conditions with or without the assistance of healthcare professionals; work through pre-determined programs for the patients particular condition | Performing therapeutic exercise (general)                                           | Not clear | HCP       | 1.9.5  | One off payment | \$4.99 | 1.9.4  | One off payment | \$4.49 |
| Haem Active          | Y | - | Both | Haemophilia                 | -   | Complete personalised exercise plan (on own or in consultation with physiotherapist); evaluate how you feel before and after exercise; set reminders to perform exercises        | Performing therapeutic exercise (haemophilia); Recording information about exercise | Unclear   | HCP       | 1.3.0  | Free            | Free   | 1.3.4  | Free            | Free   |
| Home Physio          | N | - | Both | General                     | -   | Perform exercise plan                                                                                                                                                            | Performing therapeutic exercise (general); Recording information about exercise     | Not clear | Not clear | 1.9.41 | Free            | Free   | 1.9.31 | Free            | Free   |
| My Exercise Messages | Y | - | Both | Osteoarthritis (lower limb) | MSK | Setting exercise goals, recording & monitoring of completed exercise sessions, inputting barriers to adherence & receipt of messages to overcome exercise barriers               | Recording information about exercise; setting goals, education                      | Australia | HCP       | 1.0.7  | Free            | Free   | 1.0.5  | Free            | Free   |

|                     |   |   |       |         |           |                                                                                                                                                       |                                                                                                                         |                |           |         |      |      |         |                 |        |
|---------------------|---|---|-------|---------|-----------|-------------------------------------------------------------------------------------------------------------------------------------------------------|-------------------------------------------------------------------------------------------------------------------------|----------------|-----------|---------|------|------|---------|-----------------|--------|
| My Exercise Program | Y | - | Both  | General | -         | complete exercise program; log your symptoms and progress                                                                                             | Performing therapeutic exercise (general); Recording information about exercise; Communication with health professional | Australia      | HCP       | 1.0.4   | Free | Free | 1.0.4   | Free            | Free   |
| My Injury           | N | - | Apple | General |           | Perform strengthening and flexibility exercises for injury recovery; perform taping techniques; read tips for recovery                                | Performing therapeutic exercise (general); General self-care                                                            | Unclear        | Not clear | -       | -    | -    | 1.6     | One off payment | \$1.49 |
| OT App Lite         | Y | - | Apple | General | Paeds/MSK | Perform exercises in flash-card form, including full body movements that focus on shoulder, wrist, elbow and finger movement                          | Performing therapeutic exercise (paediatrics)                                                                           | United States  | Not clear | -       | -    | -    | 1.1     | Free            | Free   |
| PhysiApp            | Y | Y | Both  | General | -         | Shows you how to perform your exercises; remember how to do your exercises within app reminders                                                       | Performing therapeutic exercise (general); Recording information about exercise; Communication with health professional | United Kingdom | Not clear | 4.6.1   | Free | Free | 2.2.7   | Free            | Free   |
| Physiotools Trainer | Y | Y | Both  | General | -         | Motivates and reminds you to complete the exercises; set up automatic reminders and preview upcoming exercises to plan your schedule; supports you in | Performing therapeutic exercise (general); Recording information about exercise                                         | Not clear      | Not clear | 1.0.919 | Free | Free | 1.0.904 | Free            | Free   |

|                                |   |   |       |         |     |                                                                                                                                                                      |                                                                                                                             |               |           |       |                 |        |        |                                   |        |
|--------------------------------|---|---|-------|---------|-----|----------------------------------------------------------------------------------------------------------------------------------------------------------------------|-----------------------------------------------------------------------------------------------------------------------------|---------------|-----------|-------|-----------------|--------|--------|-----------------------------------|--------|
|                                |   |   |       |         |     | reaching your rehabilitation and fitness goals                                                                                                                       |                                                                                                                             |               |           |       |                 |        |        |                                   |        |
| Pocket Physio                  | N | - | Apple | General | -   | Perform strengthening and flexibility exercises; perform taping techniques; engage in injury rehabilitation information                                              | Performing therapeutic exercise (peri-operative); Post-surgical self-care                                                   | Not clear     | HCP       | -     | -               | -      | 2.0.4  | One off payment                   | \$1.49 |
| PT Timer: Stretch & Exercise   | Y | - | Apple | General | -   | Perform exercises; schedule your exercises and receive reminders                                                                                                     | Performing therapeutic exercise (general); Recording information about exercise                                             | Not clear     | Not clear | -     | -               | -      | 3.3.12 | Free (in app purchases available) | Free   |
| PT-Helper Pro                  | Y | Y | Both  | General | MSK | Perform home exercise program (focusing on fitness/wellness exercises for the ankle, back, elbow, fingers, hip, knee, neck, shoulder and wrist); set daily reminders | Performing therapeutic exercise (general); Recording information about exercise                                             | United States | Non-HCP   | 2.5.3 | One off payment | \$4.89 | 1.3.0  | One off payment                   | \$4.49 |
| RecovAware Knee Health Fitness | Y | - | Apple | Knee    | MSK | Self-management of ongoing knee conditions (arthritis, patellofemoral pain etc)                                                                                      | Performing therapeutic exercise (knee); Recording information about exercise; Recording information about health condition; | Unclear       | HCP       | -     | -               | -      | 2.1.4  | Free (in app purchases available) | Free   |

|                             |   |   |       |                     |   |                                                                                                                                                                                                                           |                                                                                                                                                                                    |                |         |       |                  |                  |       |      |      |
|-----------------------------|---|---|-------|---------------------|---|---------------------------------------------------------------------------------------------------------------------------------------------------------------------------------------------------------------------------|------------------------------------------------------------------------------------------------------------------------------------------------------------------------------------|----------------|---------|-------|------------------|------------------|-------|------|------|
|                             |   |   |       |                     |   |                                                                                                                                                                                                                           | Connect with friends; General self-care; Post-surgical self-care                                                                                                                   |                |         |       |                  |                  |       |      |      |
| Rehab Guru Client           | Y | Y | Both  | General             | - | View your exercise training program; provide feedback on pain and wellness; track your progress; set reminders to perform your exercises                                                                                  | Performing therapeutic exercise (general); Recording information about exercise; Recording information about health condition                                                      | United Kingdom | HCP     | 3.0.5 | Free             | Free             | 3.0.3 | Free | Free |
| Rehand, Hand Rehabilitation | Y | - | Both  | Wrist, hand, finger | - | Perform exercise program prescribed for rehabilitation                                                                                                                                                                    | Performing therapeutic exercise (hand therapy); Recording information about exercise; Communication with health professional                                                       | Spain          | HCP     | 3.4.5 | In-app purchases | \$50.99 per item | 3.4.5 | Free | Free |
| Smart Therapist             | N | - | Apple | General             | - | Follow the advice of your therapist or trainer using recordings made during the appointment, review and recall how the exercise should be done; record the level of pain felt, number of repetitions, resistance and more | Performing therapeutic exercise (general); Recording information about exercise; Recording information about health condition; Connect with health professional (make appointment) | Australia      | Non-HCP | -     | -                | -                | 2.3.0 | Free | Free |

|                   |   |   |       |                                 |                         |                                                                                                              |                                                                                                                                      |                |     |        |                 |        |       |                                            |        |
|-------------------|---|---|-------|---------------------------------|-------------------------|--------------------------------------------------------------------------------------------------------------|--------------------------------------------------------------------------------------------------------------------------------------|----------------|-----|--------|-----------------|--------|-------|--------------------------------------------|--------|
| Squeezy           | Y | - | Both  | Pelvic health                   | Pelvic health (Women's) | Help women to remember to do their pelvic floor muscle exercises                                             | Performing therapeutic exercise (women's health); Recording information about exercise; Recording information about health condition | United Kingdom | HCP | 4.2.1  | One off payment | \$4.99 | 2.7.1 | One off payment                            | \$4.49 |
| Squeezy for Men   | Y | - | Both  | Pelvic health                   | Pelvic health (Men's)   | Support pelvic floor muscle exercise program; set to remind you when to do your exercises                    | Performing therapeutic exercise (men's health); Recording information about exercise                                                 | United Kingdom | HCP | 4.2.1  | One off payment | \$4.99 | 4.0.0 | One off payment                            | \$4.49 |
| Squeezy: CF       | Y | - | Apple | Pelvic health (cystic fibrosis) | Pelvic health           | Support pelvic floor muscle exercise program; set to remind you when to do your exercises                    | Performing therapeutic exercise (pelvic floor in cystic fibrosis); Recording information about exercise                              | United Kingdom | HCP | 1.2.11 | One off payment | \$4.99 | 1.0.1 | One off payment                            | \$4.99 |
| Switchback Health | Y | Y | Apple | General                         | -                       | Perform exercises prescribed by your physical therapist                                                      | Performing therapeutic exercise (general); Recording information about exercise                                                      | United States  | HCP | -      | -               | -      | 1.4   | Free                                       | Free   |
| TeleHab           | Y | Y | Both  | General                         | -                       | Perform training/rehabilitation exercise program; track movement compliance, RPE and pain throughout program | Performing therapeutic exercise (general); Recording information about exercise; Communication with health professional              | Australia      | HCP | 1.2    | Free            | Free   | 2.2.6 | Free                                       | Free   |
| Track Rehab       | Y | Y | Apple | General                         | MSK                     | Perform rehabilitation exercises; communicate with physiotherapist                                           | Performing therapeutic exercise (general); Recording information about exercise; Communication                                       | United Kingdom | HCP | -      | -               | -      | -     | Free (subscription version also available) | Free   |

|                               |   |   |             |            |           |                                                                                        |                                                                                                                                      |               |           |       |                                            |        |       |                                            |        |
|-------------------------------|---|---|-------------|------------|-----------|----------------------------------------------------------------------------------------|--------------------------------------------------------------------------------------------------------------------------------------|---------------|-----------|-------|--------------------------------------------|--------|-------|--------------------------------------------|--------|
|                               |   |   |             |            |           |                                                                                        | with health professional                                                                                                             |               |           |       |                                            |        |       |                                            |        |
| TrackActive Pro - Patient App | Y | Y | Both        | General    | -         | Complete exercise programs; log your symptoms and progress                             | Performing therapeutic exercise (general); Recording information about exercise; Connect with health professional (make appointment) | Not clear     | Not clear | 1.1.5 | Free                                       | Free   | 1.8.2 | Free                                       | Free   |
| Vrsteps Home rehabilitation   | Y | Y | Google play | General    | MSK       | Perform rehabilitation exercises; communicate with health professional, track progress | Performing therapeutic exercise (general); Recording information about exercise; Communication with health professional              | Isreal        | HCP       | 0.975 | Free (subscription version also available) | Free   | -     | -                                          | -      |
| Wheelchair Exercises          | Y | - | Apple       | Wheelchair | Paeds/MSK | Perform exercises in flash-card form, including some full body movements               | Performing therapeutic exercise (paediatrics)                                                                                        | United States | Not clear | 2     | One off payment                            | \$7.49 | -     | One off payment                            | \$7.99 |
| YRMOVE                        | Y | - | Apple       | General    | MSK       | Perform rehabilitation exercises; communicate with physiotherapist                     | Performing therapeutic exercise (general); Recording information about exercise                                                      | Not clear     | Not clear | -     | -                                          | -      | 1.0.6 | Free (subscription version also available) | Free   |

Abbreviations: HCP = Healthcare Professional; MSK = Musculoskeletal; Paeds = Paediatrics
