# Supplementary material for: Evaluation of Patient-Facing Mobile Apps to Support Physiotherapy Care: Systematic Review
Source: PubMed Central journal article supplement (PMC10949126; doi:10.2196/55003), 2024-03-04
Supplement: mhealth_v12i1e55003_app3.pdf [file mhealth_v12i1e55003_app3.pdf]

| ABACUS item and description                                                                                                         | Scoring system                                                                                                                                                                                                                 |
|-------------------------------------------------------------------------------------------------------------------------------------|--------------------------------------------------------------------------------------------------------------------------------------------------------------------------------------------------------------------------------|
| <b>1. Knowledge and information</b>                                                                                                 |                                                                                                                                                                                                                                |
| 1.1 Does the app have the ability to customize and personalize some features?                                                       | Score if app scored >1/5 on MARS section A.3                                                                                                                                                                                   |
| 1.2 Was the app created with expertise and/or does the app provide information that is consistent with national guidelines?         | Score if mention of relevant expertise (i.e. health care professional) involved in app creation in app store or within app, or if BCT 9.1, credible source, is present.                                                        |
| 1.3 Does the app ask for baseline information?                                                                                      |                                                                                                                                                                                                                                |
| 1.4 Does the app provide instruction on how to perform the behavior?                                                                | Score if BCT 4.1, Instruction on how to perform behavior, or BCT 6.1, demonstration of behavior, is present.                                                                                                                   |
| 1.5 Does the app provide information about the consequences of continuing and/or discontinuing behavior?                            | Score if BCT 5.1, Information about health consequences, BCT 5.2, salience of consequences, BCT 5.6, Information about emotional consequences or BCT 5.3, Information about social and environmental consequences, is present. |
| <b>2. Goals and planning</b>                                                                                                        |                                                                                                                                                                                                                                |
| 2.1 Does the app ask for willingness for behavior change?                                                                           |                                                                                                                                                                                                                                |
| 2.2 Does the app allow for the setting of goals?                                                                                    | Score if BCT 1.1, Goal setting (behavior), or BCT 1.3, Goal setting (outcome), is present.                                                                                                                                     |
| 2.3 Does the app have the ability to review goals, update, and change when necessary?                                               | Score if BCT 1.5, Review behavior goal(s), or BCT 1.7, Review outcome goals, is present.                                                                                                                                       |
| <b>3. Feedback and monitoring</b>                                                                                                   |                                                                                                                                                                                                                                |
| 3.1 Does the app give the user the ability to quickly and easily understand the difference between current action and future goals? | Score if BCT 1.6, Discrepancy between current behavior and goals, is present.                                                                                                                                                  |
| 3.2 Does the app have the ability to allow the user to easily self-monitor behavior?                                                | Score if BCT 2.3, Self-monitoring of behavior, or BCT 2.4, Self-monitoring of outcome(s) of behavior, is present.                                                                                                              |
| 3.3 Does the app have the ability to share behaviors with others (including social media                                            | Score if BCT 3.1, Social support (unspecified), BCT 3.2, Social support (practical), or BCT 3.3, Social support (emotional), is present.                                                                                       |

|                                                                                                    |                                                                                                                                                                  |
|----------------------------------------------------------------------------------------------------|------------------------------------------------------------------------------------------------------------------------------------------------------------------|
| or forums) and/or allow for social comparison?                                                     |                                                                                                                                                                  |
| 3.4 Does the app have the ability to give the user feedback—either from a person or automatically? | Score if BCT 2.2, Feedback on behavior, or BCT 2.7, Feedback on outcome(s) of behavior, or BCT 2.6, Biofeedback, is present.                                     |
| 3.5 Does the app have the ability to export data from app?                                         | Score if app has ability to "deliberately" export data.                                                                                                          |
| 3.6 Does the app provide a material or social reward or incentive?                                 | Score if BCT 10.1, Material incentive (behavior), or BCT 10.2, Material reward (behavior), or BCT 10.4, Social reward, or BCT 10.5 Social incentive, is present. |
| 3.7 Does the app provide general encouragement?                                                    | Score if BCT 10.3, Non-specific reward, or BCT 10.6, Non-specific incentive, is present.                                                                         |
| <b>4. Actions</b>                                                                                  |                                                                                                                                                                  |
| 4.1 Does the app have reminders and/or prompts or cues for activity?                               | Score if BCT 7.1, Prompts/cues, is present.                                                                                                                      |
| 4.2 Does the app encourage positive habit formation?                                               | Score if BCT 8.1, Behavioral practice/rehearsal, is present.                                                                                                     |
| 4.3 Does the app allow or encourage for practice or rehearsal, in addition to daily activities?    | Don't score if app 'locks' user access (including viewing) to content after reaching daily limit, otherwise score.                                               |
| 4.4 Does the app provide opportunity to plan for barriers?                                         | Score if BCT 1.2, Problem solving, or 1.4, Action planning, is present.                                                                                          |
| 4.5 Does the app assist with or suggest restructuring the physical or social environment?          | Score if BCT 12.1, Restructuring the physical environment, or BCT 12.2, Restructuring the social environment, is present.                                        |
| 4.6 Does the app assists with distraction or avoidance?                                            | Score if BCT 12.3, Avoidance/ reducing exposure to cues for behavior, or BCT 12.4, Distraction, is present.                                                      |
