# Supplementary material for: Evaluation of Patient-Facing Mobile Apps to Support Physiotherapy Care: Systematic Review
Source: PubMed Central journal article supplement (PMC10949126; doi:10.2196/55003), 2024-03-04
Supplement: mhealth_v12i1e55003_app5.pdf [file mhealth_v12i1e55003_app5.pdf]

| App and BCT                        | 1.1 | 1.2 | 1.3 | 1.4 | 1.5 | 1.6 | 1.7 | 2.1 | 2.2 | 2.3 | 2.4 | 2.5 | 2.6 | 2.7 | 3.1 | 3.3 | 4.1 | 5.1 | 6.1 | 6.2 | 7.1 | 8.1 | 8.3 | 9.1 | 9.2 | 10.3 | 10.4 | 10.6 |  |    |
|------------------------------------|-----|-----|-----|-----|-----|-----|-----|-----|-----|-----|-----|-----|-----|-----|-----|-----|-----|-----|-----|-----|-----|-----|-----|-----|-----|------|------|------|--|----|
| A Rehab Diary                      |     | 1   | 1   | 1   | 1   | 1   | 1   |     | 1   | 1   |     |     |     | 1   | 1   |     | 1   |     |     |     | 1   |     |     | 1   |     |      |      |      |  | 13 |
| AllyCare                           | 1   |     |     | 1   | 1   |     |     | 1   | 1   | 1   | 1   | 1   |     | 1   | 1   |     | 1   |     | 1   |     | 1   | 1   |     | 1   |     | 1    |      |      |  | 16 |
| Back Pain Diary                    |     |     |     |     |     |     |     | 1   |     | 1   | 1   | 1   |     | 1   |     |     |     |     |     |     |     |     |     |     |     |      |      |      |  | 5  |
| BlueJay Engage - Patient           | 1   |     |     | 1   |     |     |     | 1   | 1   | 1   | 1   | 1   |     | 1   | 1   |     | 1   |     | 1   |     | 1   |     |     | 1   |     |      |      |      |  | 13 |
| ComplexCore                        |     |     |     | 1   |     |     |     |     |     |     |     |     |     |     |     |     | 1   |     | 1   |     |     |     |     | 1   |     |      |      |      |  | 4  |
| CP-Fit                             |     |     |     | 1   |     |     |     |     | 1   | 1   |     |     |     |     |     |     | 1   |     | 1   |     |     |     |     |     |     | 1    |      |      |  | 6  |
| Embodia                            |     |     |     | 1   |     |     |     | 1   | 1   | 1   |     | 1   |     | 1   | 1   |     | 1   | 1   | 1   |     | 1   |     |     | 1   |     |      |      |      |  | 12 |
| ExorLive Go                        |     |     |     | 1   |     | 1   |     |     | 1   | 1   | 1   |     |     |     | 1   |     | 1   |     | 1   |     | 1   |     |     | 1   |     | 1    |      | 1    |  | 12 |
| Extensor- Physio Patients          |     |     |     | 1   |     |     |     |     | 1   | 1   |     |     |     |     | 1   |     | 1   |     | 1   |     |     |     |     | 1   |     |      |      |      |  | 7  |
| Guided Physio                      |     |     |     |     |     |     |     |     | 1   | 1   |     |     |     |     |     |     | 1   | 1   | 1   |     |     |     |     | 1   |     |      |      |      |  | 6  |
| HaemActive                         |     |     |     | 1   |     |     |     |     | 1   | 1   | 1   |     |     | 1   |     |     | 1   | 1   | 1   |     | 1   |     |     | 1   |     |      |      |      |  | 10 |
| Home Physio                        |     |     |     | 1   |     |     |     |     |     |     |     |     |     |     |     |     | 1   |     | 1   |     | 1   |     |     |     |     |      |      |      |  | 4  |
| My Exercise Messages               | 1   |     |     | 1   |     | 1   |     | 1   | 1   | 1   |     |     |     |     | 1   | 1   |     | 1   |     |     | 1   |     | 1   | 1   | 1   | 1    | 1    |      |  | 14 |
| My Exercise Program                |     |     |     | 1   |     |     |     |     | 1   | 1   |     | 1   |     | 1   |     |     | 1   |     | 1   |     |     |     |     | 1   |     |      |      |      |  | 8  |
| My Injury                          |     |     |     |     |     |     |     |     |     |     |     |     |     |     |     |     | 1   | 1   | 1   |     |     |     |     |     |     |      |      |      |  | 3  |
| OT App Lite                        |     |     |     |     |     |     |     |     |     |     |     |     |     |     |     |     | 1   |     | 1   |     |     |     |     | 1   |     |      |      |      |  | 3  |
| PhysiApp                           |     |     |     | 1   |     |     |     | 1   | 1   | 1   | 1   | 1   |     | 1   | 1   |     | 1   | 1   | 1   |     | 1   |     |     | 1   |     |      |      |      |  | 13 |
| Physiotools Trainer                |     |     |     | 1   |     |     |     |     | 1   | 1   |     |     |     |     |     |     | 1   |     | 1   |     | 1   |     |     |     |     |      |      |      |  | 6  |
| Pocket Physio                      |     |     |     | 1   |     |     |     |     |     |     |     |     |     |     |     |     | 1   | 1   | 1   |     | 1   |     |     | 1   |     |      |      |      |  | 6  |
| PT Timer: Stretch & Exercise       |     |     |     | 1   |     |     |     |     | 1   | 1   |     |     |     |     |     |     | 1   |     |     |     | 1   |     |     |     |     |      |      |      |  | 5  |
| PT-Helper Pro                      |     |     |     | 1   |     |     |     | 1   | 1   | 1   |     |     |     |     |     |     | 1   |     | 1   |     | 1   |     |     | 1   |     |      |      |      |  | 8  |
| Recov<br>Aware Knee Health Fitness |     |     |     | 1   |     |     |     |     | 1   | 1   | 1   |     |     | 1   | 1   |     |     |     |     | 1   | 1   |     |     | 1   |     |      |      |      |  | 9  |



- 2.5 = Monitoring outcome(s) of behavior by others without feedback
- 2.6 = Biofeedback
- 2.7 = Feedback on outcome(s) of behavior
- 3.1 = Social support (unspecified)
- 3.3 = Social support (emotional)
- 4.1 = Instruction on how to perform a behavior
- 5.1 = Information about health consequences
- 6.1 = Demonstration of the behavior
- 6.2 = Social comparison
- 7.1 = Prompts/cues
- 8.1 = Behavioral practice/rehearsal
- 8.3 = Habit formation
- 9.1 = Credible source
- 9.2 = Pros and cons
- 10.3 = Non-specific reward
- 10.4 = Social reward
- 10.6 = Non-specific incentive
